# Supplementary material for: Silence in Shamatha, Transcendental, and Stillness Meditation: An Evidence Synthesis Based on Expert Texts
Source: PubMed Central journal article supplement (PMC7360996; doi:10.3389/fpsyg.2020.01259), 2020-07-08
Supplement: Data_Sheet_2.pdf [file Data_Sheet_2.pdf]

## Appendix B: Searches

Table B1  
*Wallace Books Searches*

| Database       | Date            | Search                                             |
|----------------|-----------------|----------------------------------------------------|
| Google Scholar | 15 January 2018 | Search for “(shamatha OR samatha) author:wallace”  |
| Amazon U.S.    | 2 February 2018 | Search using indexed author term “B. Alan Wallace” |

Table B2  
*Wallace Other Publications Searches*

| Database       | Date            | Search                                                                                                                                                                                                                                         |
|----------------|-----------------|------------------------------------------------------------------------------------------------------------------------------------------------------------------------------------------------------------------------------------------------|
| Google Scholar | 28 January 2018 | Search for “(shamatha OR samatha) author:wallace”                                                                                                                                                                                              |
| Medline        | 28 January 2018 | Advanced search for “wallace” (author field; with indexed terms “wallace”, “wallace a”, “wallace b”, “wallace ba”), combined with advanced search for “(shamatha OR samatha)” (keywords field)                                                 |
| PsycInfo       | 28 January 2018 | Advanced search for “wallace” (author field; with indexed terms “wallace a”, “wallace alan”, “wallace b”, “wallace b alan”, “wallace bruce”, “wallace bruce alan”), combined with advanced search for “(shamatha OR samatha)” (keywords field) |
| Embase         | 28 January 2018 | Advanced search for “wallace” (author field; with indexed terms “wallace”, “wallace a”, “wallace b”, “wallace ba”) combined with advanced search for “(shamatha OR samatha)” (keywords field)                                                  |
| PubMed         | 28 January 2018 | Advanced search for “wallace” (author field) and “(shamatha OR shamatha)” (all fields)                                                                                                                                                         |
| Web of Science | 28 January 2018 | Advanced search for “wallace” (author field) and “(shamatha OR samatha)” (topic field)                                                                                                                                                         |
| Scopus         | 28 January 2018 | Search for “wallace” (author field) and “shamatha OR samatha” (author, abstract, keywords field)                                                                                                                                               |

Table B3  
*Shear Books and Other Publications Searches*

| Database       | Date           | Search                                                                                                                                                                                                |
|----------------|----------------|-------------------------------------------------------------------------------------------------------------------------------------------------------------------------------------------------------|
| Google Scholar | 8 January 2018 | Search for “‘transcendental meditation’ author:shear”                                                                                                                                                 |
| Medline        | 8 January 2018 | Advanced search for “shear” (author field; with indexed term “shear j”), combined with advanced search for “transcendental meditation” (keywords field)                                               |
| PsycInfo       | 8 January 2018 | Advanced search for “shear” (author field; with indexed term “shear jonathan”), combined with advanced search for “transcendental meditation” (keywords field)                                        |
| Embase         | 8 January 2018 | Advanced search for “shear” (author field; with indexed term “shear j”) combined with advanced search for “transcendental meditation” (keywords field; with indexed term “transcendental meditation”) |
| PubMed         | 8 January 2018 | Advanced search for “shear” (author field) and “transcendental meditation” (all fields)                                                                                                               |
| Web of Science | 8 January 2018 | Advanced search for “shear” (author field) and “transcendental meditation” (topic field)                                                                                                              |

## Appendix B: Searches

|                     |                |                                                                                                      |
|---------------------|----------------|------------------------------------------------------------------------------------------------------|
| Scopus              | 8 January 2018 | Search for “shear” (author field) and “transcendental meditation” (author, abstract, keywords field) |
| PhilPapers          | 8 January 2018 | Advanced search for “shear” and “transcendental meditation”                                          |
| Philosopher’s Index | 8 January 2018 | Search for “shear” (author field) and “transcendental meditation” (all fields)                       |
| Amazon U.S.         | 8 January 2018 | Search for “jonathan shear”                                                                          |

**Table B4**  
*Travis Books and Other Publications Searches*

| Database       | Date           | Search <sup>a</sup>                                                                                                                                                                                                                  |
|----------------|----------------|--------------------------------------------------------------------------------------------------------------------------------------------------------------------------------------------------------------------------------------|
| Google Scholar | 8 January 2018 | Search for “‘transcendental meditation’ author:travis”                                                                                                                                                                               |
| Medline        | 8 January 2018 | Advanced search for “travis” (author field; with indexed terms “travis f” and “travis ft”), combined with advanced search for “transcendental meditation” (keywords field)                                                           |
| PsycInfo       | 8 January 2018 | Advanced search for “travis” (author field; with indexed terms “travis”, “travis fred”, “travis frederick”, “travis frederick t”, “travis fredrick”), combined with advanced search for “transcendental meditation” (keywords field) |
| Embase         | 8 January 2018 | Advanced search for “travis” (author field; with indexed terms “travis”, “travis f”, “travis ft”) combined with advanced search for “transcendental meditation” (keywords field; with indexed term “transcendental meditation”)      |
| PubMed         | 8 January 2018 | Advanced search for “travis” (author field) and “transcendental meditation” (all fields)                                                                                                                                             |
| Web of Science | 8 January 2018 | Advanced search for “travis” (author field) and “transcendental meditation” (topic field)                                                                                                                                            |
| Scopus         | 8 January 2018 | Search for “travis” (author field) and “transcendental meditation” (author, abstract, keywords field)                                                                                                                                |
| Amazon U.S.    | 9 January 2018 | Search for “travis ‘transcendental meditation’”                                                                                                                                                                                      |

<sup>a</sup>All searches were narrowed to 2000 onwards

**Table B5**  
*Meares Other Publications Searches*

| Database       | Date            | Search <sup>a</sup>                                                                             |
|----------------|-----------------|-------------------------------------------------------------------------------------------------|
| Google Scholar | 31 January 2018 | Search for “(meditation or hypnosis) author:meares”<br>Search for “author:a meares”             |
| Medline        | 31 January 2018 | Advanced search for “meares” (author field; with indexed term “meares a”)                       |
| PsycInfo       | 31 January 2018 | Advanced search for “meares” (author field; with indexed terms “meares a” and “meares ainslie”) |
| Embase         | 31 January 2018 | Advanced search for “meares” (author field; with indexed term “meares a”)                       |
| PubMed         | 31 January 2018 | Advanced search for “meares” (author field)                                                     |
| Web of Science | 31 January 2018 | Advanced search for “meares” (author field) and “meditation” or “hypnosis” (topic field)        |

## Appendix B: Searches

|           |                 |                                                                                                    |
|-----------|-----------------|----------------------------------------------------------------------------------------------------|
| Scopus    | 31 January 2018 | Search for “meares” (author field) and “meditation OR hypnosis” (author, abstract, keywords field) |
| Discovery | 31 January 2018 | Advanced search for “meares” (author field) and “(meditation or hypnosis)” (all fields)            |

---

<sup>a</sup> All searches were narrowed to 1957 onwards

*Note:* Unless otherwise specified, the searches in Tables B1 to B5 covered all years of the relevant database (i.e., the database inception date to the date of the search).
