# Supplementary material for: Silence in Shamatha, Transcendental, and Stillness Meditation: An Evidence Synthesis Based on Expert Texts
Source: PubMed Central journal article supplement (PMC7360996; doi:10.3389/fpsyg.2020.01259), 2020-07-08
Supplement: Data_Sheet_6.pdf [file Data_Sheet_6.pdf]

## Appendix F: Final Publications Selected

Table F1  
*Publications Selected for Shamatha*

| Citation <sup>a</sup>      | Title                                                                                                                                                             | Publication type | Section/s reviewed                                        |
|----------------------------|-------------------------------------------------------------------------------------------------------------------------------------------------------------------|------------------|-----------------------------------------------------------|
| Wallace and Wilhelm (1993) | Tibetan Buddhism from the ground up: A practical approach for modern life                                                                                         | Book             | Pages ix-x, 42-43, 105-118, 135-137, 148-151 <sup>b</sup> |
| Wallace (1999a)            | The Buddhist tradition of Samatha: Methods for refining and examining consciousness                                                                               | Journal article  | All                                                       |
| Wallace (1999b)            | Training the attention and exploring consciousness in Tibetan Buddhism                                                                                            | Book chapter     | All                                                       |
| Wallace (2000)             | The taboo of subjectivity. Toward a new science of consciousness                                                                                                  | Book             | Pages 8-13, 103-120 <sup>c</sup>                          |
| Wallace (2001a)            | Intersubjectivity in Indo-Tibetan Buddhism                                                                                                                        | Journal article  | All                                                       |
| Wallace (2001b)            | The potential of emptiness: Vacuum states in physics and consciousness                                                                                            | Journal article  | All                                                       |
| Wallace (2001/2003)        | Buddhism with an attitude: The Tibetan seven-point mind-training                                                                                                  | Book             | Pages 7-11, 65-67, 76-154, 229-235, 273-278 <sup>b</sup>  |
| Wallace (1989/2003)        | Choosing reality: A Buddhist view of physics and the mind                                                                                                         | Book             | Pages 149-151, 191-199 <sup>b</sup>                       |
| Wallace (2004)             | Scientific and Buddhist views of energy                                                                                                                           | Journal article  | All                                                       |
| Wallace (1998/2005)        | Balancing the mind: A Tibetan Buddhist approach to refining attention                                                                                             | Book             | All                                                       |
| Wallace (2005)             | Genuine happiness: Meditation as the path to fulfillment                                                                                                          | Book             | All                                                       |
| Wallace (2006a)            | The attention revolution: Unlocking the power of the focused mind                                                                                                 | Book             | All                                                       |
| Wallace (2006b)            | Vacuum states of consciousness: A Tibetan Buddhist view                                                                                                           | Book chapter     | All                                                       |
| Wallace and Shapiro (2006) | Mental balance and well-being: Building bridges between Buddhism and western psychology                                                                           | Journal article  | All                                                       |
| Wallace (2007a)            | Contemplative science: Where Buddhism and neuroscience converge                                                                                                   | Book             | Pages 11-27, 58-108, 163-165 <sup>c, d</sup>              |
| Wallace (2007b)            | Hidden dimensions: The unification of physics and consciousness                                                                                                   | Book             | Pages vii-xi, 36-49, 58-69, 85-121 <sup>c</sup>           |
| Wallace and Hodel (2008)   | Embracing mind: The common ground of science & spirituality                                                                                                       | Book             | All                                                       |
| Wallace (2010)             | The four immeasurables: Practices to open the heart                                                                                                               | Book             | Pages 31-86, 163-183 <sup>b</sup>                         |
| Wallace (2011a)            | Minding closely: The four applications of mindfulness                                                                                                             | Book             | All                                                       |
| Wallace (2011b)            | Stilling the mind: Shamatha teachings from Dūdjom Lingpa's Vajra Essence                                                                                          | Book             | All                                                       |
| Desbordes et al. (2012)    | Effects of mindful-attention and compassion meditation training on amygdala response to emotional stimuli in an ordinary, non-meditative state                    | Journal article  | All                                                       |
| Wallace (2012)             | Dreaming yourself awake: Lucid dreaming and Tibetan dream yoga for insight and transformation                                                                     | Book             | Pages 1-18, 135-150, 159-163 <sup>c</sup>                 |
| Wallace (2012/2014)        | Meditations of a Buddhist skeptic: A manifesto for the mind sciences and contemplative practice                                                                   | Book             | All                                                       |
| Wallace (2009/2014)        | Mind in the balance: Meditation in science, Buddhism, and Christianity                                                                                            | Book             | All                                                       |
| Kozasa et al. (2015)       | Effects of a 9-day shamatha Buddhist meditation retreat on attention, mindfulness and self-compassion in participants with a broad range of meditation experience | Journal article  | All                                                       |

Appendix F: Final Publications Selected

|                       |                                                                          |                 |     |
|-----------------------|--------------------------------------------------------------------------|-----------------|-----|
| Zanesco et al. (2016) | Meditation training influences mind wandering and mindless reading       | Journal article | All |
| Wallace (2018)        | Fathoming the mind: Inquiry and insight in Dūdjom Lingpa’s Vajra Essence | Book            | All |

*Note.* <sup>a</sup> Publications by Wallace, as author or co-author, are ordered by year of publication (earliest to latest) of the version reviewed. <sup>b</sup> Content relating to the Shamatha practices, plus contextual material. <sup>c</sup> Relevant content relating to Tibetan Buddhism (including Dzogchen practices), plus contextual material. <sup>d</sup> Chapter 6 (*Worlds of Intersubjectivity*; pp. 109-134) was not reviewed, as the book notes (p. 180) that it was first published as Wallace (2001a), a publication that was separately reviewed. Similarly, Chapter 7 (*Samatha: The Contemplative Refinement of Attention*; pp. 135-148) was not reviewed, as the book notes (p. 182) that it was first published as Wallace (1999a), which was separately reviewed.

Table F2  
*Publications Selected for TM*

| Citation <sup>a</sup>                  | Title                                                                                                     | Publication type | Section/s reviewed                                                                                                                      |
|----------------------------------------|-----------------------------------------------------------------------------------------------------------|------------------|-----------------------------------------------------------------------------------------------------------------------------------------|
| Pearson                                |                                                                                                           |                  |                                                                                                                                         |
| Pearson (2013)                         | The supreme awakening: Experiences of enlightenment throughout time and how you can cultivate them        | Book             | All material relating to TM specifically (as distinct from material concerning experiences in other traditions, practices, or contexts) |
| Rosenthal                              |                                                                                                           |                  |                                                                                                                                         |
| Rosenthal (2011/2012)                  | Transcendence: Healing and transformation through Transcendental Meditation                               | Book             | All                                                                                                                                     |
| Rosenthal (2016/2017)                  | Super Mind: How to boost performance and live a richer and happier life through Transcendental Meditation | Book             | All                                                                                                                                     |
| Roth                                   |                                                                                                           |                  |                                                                                                                                         |
| Roth (2018)                            | Strength in stillness: The power of Transcendental Meditation                                             | Book             | All                                                                                                                                     |
| Shear                                  |                                                                                                           |                  |                                                                                                                                         |
| Shear (1990a)                          | Mystical experience, hermeneutics, and rationality                                                        | Journal article  | All                                                                                                                                     |
| Shear (1990b)                          | The inner dimension: Philosophy and the experience of consciousness                                       | Book             | All                                                                                                                                     |
| Shear (1994)                           | On mystical experiences as support for the perennial philosophy                                           | Journal article  | All                                                                                                                                     |
| Shear (1995)                           | Mystical knowledge?                                                                                       | Journal article  | All                                                                                                                                     |
| Shear (1996a)                          | Back and forth with Huston Smith                                                                          | Journal article  | All                                                                                                                                     |
| Shear (1996b)                          | On the existence of a culture independent core component of self                                          | Book chapter     | All                                                                                                                                     |
| Shear (1995/1997a)                     | Introduction                                                                                              | Book chapter     | All                                                                                                                                     |
| Shear (1995/1997b) <sup>b</sup>        | The hard problem: Closing the empirical gap                                                               | Book chapter     | All                                                                                                                                     |
| Gallagher and Shear (1999)             | Editors’ introduction                                                                                     | Book chapter     | All                                                                                                                                     |
| Shear (1998/1999) <sup>c</sup>         | Experiential clarification of the problem of self                                                         | Book chapter     | All                                                                                                                                     |
| Shear and Jevning (1999a) <sup>d</sup> | Pure consciousness: Scientific exploration of meditation techniques                                       | Journal article  | All                                                                                                                                     |
| Varela and Shear (1999b) <sup>c</sup>  | First-person methodologies: What, why, how?                                                               | Journal article  | All                                                                                                                                     |

## Appendix F: Final Publications Selected

|                                        |                                                                                                                                                    |                 |     |
|----------------------------------------|----------------------------------------------------------------------------------------------------------------------------------------------------|-----------------|-----|
| Shear (2002)                           | Ethics and the experience of happiness                                                                                                             | Book chapter    | All |
| Shear (2001/2002)                      | Experimental studies of meditation and consciousness                                                                                               | Book chapter    | All |
| Shear (2004)                           | Mysticism and scientific naturalism                                                                                                                | Journal article | All |
| Shear (2006a)                          | Conclusion                                                                                                                                         | Book chapter    | All |
| Shear (2006b)                          | Introduction                                                                                                                                       | Book chapter    | All |
| Shear (2006c)                          | Transcendental Meditation                                                                                                                          | Book chapter    | All |
| Shear (2007)                           | Eastern methods of investigating mind and consciousness                                                                                            | Book chapter    | All |
| Travis and Shear (2010a) <sup>f</sup>  | Focused attention, open monitoring and automatic self-transcending: Categories to organize meditations from Vedic, Buddhist and Chinese traditions | Journal article | All |
| Travis and Shear (2010b) <sup>f</sup>  | Reply to Josipovic: Duality and non-duality in meditation research                                                                                 | Journal article | All |
| Shear (2011a)                          | Eastern approaches to altered states of consciousness                                                                                              | Book chapter    | All |
| Shear (2011b)                          | State-enlivening and practice-makes-perfect approaches to meditation                                                                               | Journal article | All |
| Shear (2014a)                          | Meditation as first-person methodology: Real promise—and problems                                                                                  | Book chapter    | All |
| Shear (2014b)                          | Some reflections on meditation research and consciousness studies                                                                                  | Journal article | All |
| Travis                                 |                                                                                                                                                    |                 |     |
| Travis and Pearson (2000) <sup>g</sup> | Pure consciousness: Distinct phenomenological and physiological correlates of “consciousness itself”                                               | Journal article | All |
| Travis (2001)                          | Autonomic and EEG patterns distinguish transcending from other experiences during Transcendental Meditation practice                               | Journal article | All |
| Arenander and Travis (2004)            | Brain patterns of self-awareness                                                                                                                   | Journal article | All |
| Travis et al. (2005)                   | Maharishi Vedic science addresses the “hard” problem of consciousness                                                                              | Journal article | All |
| Travis (2006)                          | From I to I: Concepts of self on an object-referral/self-referral continuum                                                                        | Book chapter    | All |
| Travis (2009)                          | Brain functioning as the ground for spiritual experiences and ethical behavior                                                                     | Journal article | All |
| Travis (2010)                          | The Center for Brain, Consciousness, and Cognition at Maharishi University of Management                                                           | Journal article | All |
| Travis and Shear (2010a) <sup>f</sup>  | Focused attention, open monitoring and automatic self-transcending: Categories to organize meditations from Vedic, Buddhist and Chinese traditions | Journal article | All |
| Travis and Shear (2010b) <sup>f</sup>  | Reply to Josipovic: Duality and non-duality in meditation research                                                                                 | Journal article | All |
| Travis (2011)                          | States of consciousness beyond waking, dreaming and sleeping: Perspectives from research on meditation experiences                                 | Book chapter    | All |
| Heaton et al. (2012)                   | A consciousness-based approach to management education for integrity                                                                               | Book chapter    | All |
| Travis (2014)                          | Transcendental experiences during meditation practice                                                                                              | Journal article | All |
| Heaton and Travis (2014)               | Consciousness, empathy, and the brain                                                                                                              | Book chapter    | All |
| Travis (2016)                          | Transcending as a driver of development                                                                                                            | Journal article | All |
| Faber et al. (2017)                    | EEG microstates during different phases of Transcendental Meditation practice                                                                      | Journal article | All |
| Travis and Parim (2017)                | Default mode network activation and Transcendental Meditation practice: Focused attention or automatic self-transcending?                          | Journal article | All |

Appendix F: Final Publications Selected

|                         |                                                                                               |                 |     |
|-------------------------|-----------------------------------------------------------------------------------------------|-----------------|-----|
| Travis (2018)           | Long-term changes in experienced yoga practitioners: Growth of higher states of consciousness | Book chapter    | All |
| Gobec and Travis (2018) | Effects of Maharishi Yoga Asanas on mood states, happiness, and experiences during meditation | Journal article | All |

*Note.* <sup>a</sup> Publications of each of the five main authors (Pearson, Rosenthal, Roth, Shear, Travis), as author or co-author, are ordered by year of publication (earliest to latest) of the version reviewed. <sup>b</sup> Originally published as Shear (1996c). <sup>c</sup> Originally published as Shear (1998). <sup>d</sup> Also published as Shear and Jevning (1999b). <sup>e</sup> Also published as Varela and Shear (1999a). <sup>f</sup> Travis and Shear (2010a, 2010b) are included in both the Shear and Travis sections of the table, as they were identified from the Travis searches and the Shear searches. <sup>g</sup> Also published as Travis and Pearson (2010). For the reasons provided in the section “Selection of Publications”, Travis and Pearson (2000) is included in the Travis section but not the Pearson section.

Table F3

*Publications Selected for Stillness Meditation*

| Citation <sup>a</sup>       | Title                                                                       | Publication type | Section/s reviewed |
|-----------------------------|-----------------------------------------------------------------------------|------------------|--------------------|
| <b>McKinnon</b>             |                                                                             |                  |                    |
| McKinnon (1991)             | Help yourself and your child to happiness                                   | Book             | All                |
| McKinnon (2002/2008)        | Let’s be still: Teaching Stillness Meditation to children and adolescents   | Book – Manual    | All                |
| McKinnon (2011)             | Living calm in a busy world: Stillness Meditation in the Meares tradition   | Book             | All                |
| McKinnon (1983/2016)        | In stillness conquer fear: How to break free from anxiety and phobias       | Book             | All                |
| <b>Meares</b>               |                                                                             |                  |                    |
| Meares (1967a)              | Pain and the psychiatrist                                                   | Journal article  | All                |
| Meares (1967b)              | Psychological control of organically determined pain                        | Journal article  | All                |
| Meares (1967c)              | Suggestion, hypnosis and intuition                                          | Journal article  | All                |
| Meares (1967d)              | Teaching the patient control of organically determined pain                 | Journal article  | All                |
| Meares (1967e)              | The space between                                                           | Journal article  | All                |
| Meares (1967/1968)          | Relief without drugs: The self-management of tension, anxiety, and pain     | Book             | All                |
| Meares (1968a)              | Hypnotherapy without the phenomena of hypnosis                              | Journal article  | All                |
| Meares (1968b)              | Psychological mechanisms in the relief of pain by hypnosis                  | Journal article  | All                |
| Meares (1968c)              | Umm                                                                         | Journal article  | All                |
| Meares (1969a)              | Hypnosis and transcendental religious experience                            | Journal article  | All                |
| Meares (1969d)              | The place of hypnosis in the treatment of anxiety                           | Journal article  | All                |
| Meares (1969b)              | Strange places and simple truths: A psychiatrist looks at eastern mysticism | Book             | All                |
| Meares (1969c)              | Student problems and a guide to study                                       | Book             | All                |
| Meares (1970)               | The way up: The practical psychology of success                             | Book             | All                |
| Meares (1971a) <sup>b</sup> | Group relaxing hypnosis                                                     | Journal article  | All                |
| Meares (1971c)              | The nature, use and abuse of hypnosis                                       | Journal article  | All                |
| Meares (1973a)              | A psychiatric experiment in community service                               | Journal article  | All                |
| Meares (1973b)              | Dialogue with youth                                                         | Book             | All                |

## Appendix F: Final Publications Selected

|                             |                                                                                                                  |                                 |     |
|-----------------------------|------------------------------------------------------------------------------------------------------------------|---------------------------------|-----|
| Meares (1973c)              | Nervous tension in professional life                                                                             | Journal article                 | All |
| Meares (1974a)              | The drop-out syndrome                                                                                            | Journal article                 | All |
| Meares (1974b)              | The new woman: Women at the crossroads of social and psychological revolution                                    | Book                            | All |
| Meares (1975)               | Why be old? How to avoid the psychological reactions of ageing                                                   | Book                            | All |
| Meares (1976a)              | Regression of cancer after intensive meditation                                                                  | Journal article                 | All |
| Meares (1976b)              | The relief of anxiety through relaxing meditation                                                                | Journal article                 | All |
| Meares (1977a)              | Atavistic regression as a factor in the remission of cancer                                                      | Journal article                 | All |
| Meares (1977b)              | Cancer: Another way?                                                                                             | Book – verse-style <sup>c</sup> | All |
| Meares (1977c)              | The quality of meditation effective in the regression of cancer                                                  | Journal article                 | All |
| Meares (1978a)              | Regression of osteogenic sarcoma metastases associated with intensive meditation                                 | Journal article                 | All |
| Meares (1978b)              | The hidden powers of leadership                                                                                  | Book                            | All |
| Meares (1978c)              | Vivid visualization and dim visual awareness in the regression of cancer in meditation                           | Journal article                 | All |
| Meares (1979b)              | Dialogue on meditation                                                                                           | Book – verse-style              | All |
| Meares (1979c) <sup>d</sup> | Meditation and cancer                                                                                            | Journal article                 | All |
| Meares (1979d)              | Meditation: A psychological approach to cancer treatment                                                         | Journal article                 | All |
| Meares (1979a)              | Atavistic communication by touch in the psychological treatment of cancer by intensive meditation                | Journal article                 | All |
| Meares (1979e)              | Regression of cancer of the rectum after intensive meditation                                                    | Journal article                 | All |
| Meares (1979f)              | The psychological treatment of cancer: The patient's confusion of the time for living with the time for dying    | Journal article                 | All |
| Meares (1976/1980)          | Let's be human: New reactions for old                                                                            | Book                            | All |
| Meares (1980a)              | Massage as an adjunct to meditation in the psychological treatment of cancer                                     | Journal article                 | All |
| Meares (1980b)              | Our attitude of mind in the psychological treatment of cancer                                                    | Journal article                 | All |
| Meares (1980c)              | Remission of massive metastasis from undifferentiated carcinoma of the lung associated with intensive meditation | Journal article                 | All |
| Meares (1980e)              | Thoughts                                                                                                         | Book – verse-style              | All |
| Meares (1980f)              | What can the cancer patient expect from intensive meditation?                                                    | Journal article                 | All |
| Meares (1981a)              | Cancer, psychosomatic illness, and hysteria                                                                      | Journal article                 | All |
| Meares (1981b)              | Prayer and beyond                                                                                                | Book – verse-style              | All |
| Meares (1981c)              | Regression of recurrence of carcinoma of the breast at mastectomy site associated with intensive meditation      | Journal article                 | All |
| Meares (1982a)              | Meditation and the prevention of the recurrence of cancer                                                        | Journal article                 | All |
| Meares (1982b)              | My soul and I                                                                                                    | Book – verse-style              | All |
| Meares (1982c)              | Stress, meditation and the regression of cancer                                                                  | Journal article                 | All |
| Meares (1983a)              | A form of intensive meditation associated with the regression of cancer                                          | Journal article                 | All |
| Meares (1983b)              | Psychological mechanisms in the regression of cancer                                                             | Journal article                 | All |
| Meares (1984)               | A way of doctoring                                                                                               | Book – verse style              | All |
| Meares (1976/1984)          | From the quiet place                                                                                             | Book – verse-style              | All |
| Meares (1978/1986)          | The wealth within: Self-help through a system of relaxing meditation                                             | Book                            | All |

Appendix F: Final Publications Selected

|                    |                                                               |                    |     |
|--------------------|---------------------------------------------------------------|--------------------|-----|
| Meares (1987a)     | Let's be at ease                                              | Book – verse-style | All |
| Meares (1987b)     | Man and woman                                                 | Book – verse-style | All |
| Meares (1988)      | The silver years: Practical advice for a rewarding later life | Book               | All |
| Meares (1989)      | A better life: The guide to meditation                        | Book               | All |
| Meares (1984/1989) | A kind of believing                                           | Book – verse-style | All |
| Meares (1987/1991) | Life without stress: The self-management of stress            | Book               | All |

---

*Note.* <sup>a</sup> Publications of each of Meares and McKinnon are ordered by year of publication (earliest to latest) of the version reviewed. <sup>b</sup> Also published as Meares (1971b).  
<sup>c</sup> Meares used the verse-style structure in certain of his books (as identified in the table) to encourage the meditator to “[read] between the lines”, and consequently move beyond logic (Meares, 1983a, p. 120). For this reason he saw them as more like Zen Buddhist writings than poetry. <sup>d</sup> Also published as Meares (1980d).

## References

- Arenander, A., and Travis, F. (2004). "Brain patterns of self-awareness," in *Deficits of self-awareness in psychiatric disorders*, eds. B. Beitman and J. Nair (New York, NY: Norton), 112–126.
- Desbordes, G., Negi, L. T., Pace, T. W., Wallace, B. A., Raison, C. L., and Schwartz, E. L. (2012). Effects of mindful-attention and compassion meditation training on amygdala response to emotional stimuli in an ordinary, non-meditative state. *Frontiers in Human Neuroscience* 6, 1–15. doi:10.3389/fnhum.2012.00292.
- Faber, P. L., Travis, F., Milz, P., and Parim, N. (2017). EEG microstates during different phases of Transcendental Meditation practice. *Cognitive Processing* 18, 307–314. doi:10.1007/s10339-017-0812-y.
- Gallagher, S., and Shear, J. (1999). "Editors' introduction," in *Models of the self*, eds. S. Gallagher and J. Shear (Devon, United Kingdom: Imprint), ix–xviii.
- Gobec, S., and Travis, F. (2018). Effects of Maharishi Yoga Asanas on mood states, happiness, and experiences during meditation. *International Journal of Yoga* 11, 66–71. doi:10.4103/ijoy.IJOY\_66\_16.
- Heaton, D. P., and Travis, F. (2014). "Consciousness, empathy, and the brain," in *Organizing through empathy*, eds. K. Pavlovich and K. Krahnke (New York, NY: Routledge), 17–33.
- Heaton, D. P., Travis, F., and Subramaniam, R. (2012). "A consciousness-based approach to management education for integrity," in *Handbook of research on teaching ethics in business and management education*, eds. C. Wankel and A. Stachowicz-Stanusch (Hershey, PA: IGI Global), 65–79.
- Kozasa, E. H., Lacerda, S. S., Menezes, C., Wallace, B. A., Radvany, J., Mello, L. E., et al. (2015). Effects of a 9-day shamatha Buddhist meditation retreat on attention, mindfulness and self-compassion in participants with a broad range of meditation experience. *Mindfulness* 6, 1235–1241. doi:10.1007/s12671-015-0385-8.
- McKinnon, P. (1991). *Help yourself and your child to happiness*. Melbourne, Australia: David Lovell.
- McKinnon, P. (2002/2008). *Let's be still: Teaching Stillness Meditation to children and adolescents*. Melbourne, Australia: David Lovell.
- McKinnon, P. (2011). *Living calm in a busy world: Stillness Meditation in the Meares tradition*. Melbourne, Australia: David Lovell.
- McKinnon, P. (1983/2016). *In stillness conquer fear: How to break free from anxiety and phobias*. Rev. ed. Melbourne, Australia: Garratt.
- Meares, A. (1967a). Pain and the psychiatrist. *Australian and New Zealand Journal of Psychiatry* 1, 116–117. doi:10.3109/00048676709159179.

- Meares, A. (1967b). Psychological control of organically determined pain. *Annals of the Australian College of Dental Surgeons* 1, 42–46.
- Meares, A. (1967c). Suggestion, hypnosis and intuition. *Proceedings of the Medico-Legal Society of Victoria* 11, 73–84.
- Meares, A. (1967d). Teaching the patient control of organically determined pain. *The Medical Journal of Australia* 1, 11–12. doi:10.5694/j.1326-5377.1967.tb20984.x.
- Meares, A. (1967e). The space between. *The International Journal of Clinical and Experimental Hypnosis* 15, 156–159.
- Meares, A. (1968a). Hypnotherapy without the phenomena of hypnosis. *International Journal of Clinical and Experimental Hypnosis* 16, 211–214. doi:10.1080/00207146808410594.
- Meares, A. (1968b). Psychological mechanisms in the relief of pain by hypnosis. *American Journal of Clinical Hypnosis* 11, 55–57. doi:10.1080/00029157.1968.10402002.
- Meares, A. (1967/1968). *Relief without drugs: The self-management of tension, anxiety, and pain*. London, United Kingdom: Souvenir Press.
- Meares, A. (1968c). Umm. *The Medical Journal of Australia* 2, 638. doi:10.5694/j.1326-5377.1968.tb83053.x.
- Meares, A. (1969a). Hypnosis and transcendental religious experience. *Journal of Existential Psychiatry* 7, 119–121.
- Meares, A. (1969b). *Strange places and simple truths: A psychiatrist looks at eastern mysticism*. United Kingdom, London: Souvenir Press.
- Meares, A. (1969c). *Student problems and a guide to study*. Melbourne, Australia: Hawthorn Press.
- Meares, A. (1969d). The place of hypnosis in the treatment of anxiety. *Australian and New Zealand Journal of Psychiatry* 3, 299–300.
- Meares, A. (1970). *The way up: The practical psychology of success*. London, United Kingdom: Souvenir Press.
- Meares, A. (1971a). Group relaxing hypnosis. *The Medical Journal of Australia* 2, 675–676.
- Meares, A. (1971b). Group relaxing hypnosis. *The Journal of the American Society of Psychosomatic Dentistry and Medicine* 19, 137–141.
- Meares, A. (1971c). The nature, use and abuse of hypnosis. *Australian Journal of Forensic Sciences* 3, 157–161. doi:10.1080/00450617109413182.
- Meares, A. (1973a). A psychiatric experiment in community service. *The Medical Journal of Australia* 15, 733–734. doi:10.5694/j.1326-5377.1973.tb110661.x.
- Meares, A. (1973b). *Dialogue with youth*. London, United Kingdom: Collins.



- Meares, A. (1973c). Nervous tension in professional life. *Proceedings of the Medico-Legal Society of Victoria* 12, 277–284.
- Meares, A. (1974a). The drop-out syndrome. *Australian Family Physician* 3, 164–168.
- Meares, A. (1974b). *The new woman: Women at the crossroads of social and psychological revolution*. London, United Kingdom: Collins.
- Meares, A. (1975). *Why be old? How to avoid the psychological reactions of ageing*. London, United Kingdom: Collins.
- Meares, A. (1976a). Regression of cancer after intensive meditation. *The Medical Journal of Australia* 2, 184. doi:10.5694/j.1326-5377.1976.tb134456.x.
- Meares, A. (1976b). The relief of anxiety through relaxing meditation. *Australian Family Physician* 5, 906–910.
- Meares, A. (1977a). Atavistic regression as a factor in the remission of cancer. *The Medical Journal of Australia* 2, 132–133. doi:10.5694/j.1326-5377.1977.tb99090.x.
- Meares, A. (1977b). *Cancer: Another way?*. Melbourne, Australia: Hill of Content.
- Meares, A. (1977c). The quality of meditation effective in the regression of cancer. *The Journal of the American Society of Psychosomatic Dentistry and Medicine* 25, 129–132.
- Meares, A. (1978a). Regression of osteogenic sarcoma metastases associated with intensive meditation. *The Medical Journal of Australia* 2, 433. doi:10.5694/j.1326-5377.1978.tb76834.x.
- Meares, A. (1978b). *The hidden powers of leadership*. Melbourne, Australia: Hill of Content.
- Meares, A. (1978c). Vivid visualization and dim visual awareness in the regression of cancer in meditation. *The Journal of the American Society of Psychosomatic Dentistry and Medicine* 25, 85–88.
- Meares, A. (1979a). Atavistic communication by touch in the psychological treatment of cancer by intensive meditation. *Journal of Holistic Health* 4, 120–124.
- Meares, A. (1979b). *Dialogue on meditation*. Melbourne, Australia: Hill of Content.
- Meares, A. (1979c). Meditation and cancer. *Yoga Quarterly* 14, 27–31.
- Meares, A. (1979d). Meditation: A psychological approach to cancer treatment. *The Practitioner* 222, 119–122.
- Meares, A. (1979e). Regression of cancer of the rectum after intensive meditation. *The Medical Journal of Australia* 2, 539–540. doi:10.5694/j.1326-5377.1979.tb127157.x.
- Meares, A. (1979f). The psychological treatment of cancer: The patient's confusion of the time for living with the time for dying. *Australian Family Physician* 8, 801–805.

- Meares, A. (1976/1980). *Let's be human: New reactions for old*. Melbourne, Australia: Hill of Content.
- Meares, A. (1980a). Massage as an adjunct to meditation in the psychological treatment of cancer. *Australian Journal of Physiotherapy* 26, 25–26. doi:10.1016/s0004-9514(14)60799-6.
- Meares, A. (1980b). Our attitude of mind in the psychological treatment of cancer. *Australian Nurses Journal* 9, 29–30.
- Meares, A. (1980c). Remission of massive metastasis from undifferentiated carcinoma of the lung associated with intensive meditation. *The Journal of the American Society of Psychosomatic Dentistry and Medicine* 27, 40–41.
- Meares, A. (1980d). The onflow of meditation in the psychological treatment of cancer. *Journal of the Helen Vale Foundation* 2, 10–14.
- Meares, A. (1980e). *Thoughts*. Melbourne, Australia: Hill of Content.
- Meares, A. (1980f). What can the cancer patient expect from intensive meditation? *Australian Family Physician* 9, 322–325.
- Meares, A. (1981a). Cancer, psychosomatic illness, and hysteria. *The Lancet* 318, 1037–1038. doi:10.1016/s0140-6736(81)91228-9.
- Meares, A. (1981b). *Prayer and beyond*. Melbourne, Australia: Hill of Content.
- Meares, A. (1981c). Regression of recurrence of carcinoma of the breast at mastectomy site associated with intensive meditation. *Australian Family Physician* 10, 218–219.
- Meares, A. (1982a). Meditation and the prevention of the recurrence of cancer. *Journal of the Helen Vale Foundation* 3, 13–16.
- Meares, A. (1982b). *My soul and I*. Melbourne, Australia: Author.
- Meares, A. (1982c). Stress, meditation and the regression of cancer. *The Practitioner* 226, 1607–1609.
- Meares, A. (1983a). A form of intensive meditation associated with the regression of cancer. *American Journal of Clinical Hypnosis* 25, 114–121. doi:10.1080/00029157.1982.10404082.
- Meares, A. (1983b). Psychological mechanisms in the regression of cancer. *The Medical Journal of Australia* 1, 583–584. doi:10.5694/j.1326-5377.1983.tb136229.x.
- Meares, A. (1984). *A way of doctoring*. Melbourne, Australia: Hill of Content.
- Meares, A. (1976/1984). *From the quiet place*. Melbourne, Australia: Hill of Content.
- Meares, A. (1978/1986). *The wealth within: Self-help through a system of relaxing meditation*. Melbourne, Australia: Hill of Content.

- Meares, A. (1987a). *Let's be at ease*. Melbourne, Australia: Greenhouse.
- Meares, A. (1987b). *Man and woman*. Melbourne, Australia: Greenhouse.
- Meares, A. (1988). *The silver years: Practical advice for a rewarding later life*. Melbourne, Australia: Greenhouse.
- Meares, A. (1989). *A better life: The guide to meditation*. Melbourne, Australia: Greenhouse.
- Meares, A. (1984/1989). "A kind of believing," in *Dialogue on meditation; From the quiet place; A kind of believing* (Melbourne, Australia: Hill of Content).
- Meares, A. (1987/1991). *Life without stress: The self-management of stress*. Melbourne, Australia: Penguin.
- Pearson, C. (2013). *The supreme awakening: Experiences of enlightenment throughout time – and how you can cultivate them*. Fairfield, IA: Maharishi University of Management Press.
- Rosenthal, N. E. (2011/2012). *Transcendence: Healing and transformation through Transcendental Meditation*. New York, NY: Penguin.
- Rosenthal, N. E. (2016/2017). *Super Mind: How to boost performance and live a richer and happier life through Transcendental Meditation*. New York, NY: Penguin.
- Roth, B. (2018). *Strength in stillness: The power of Transcendental Meditation*. London, United Kingdom: Simon & Schuster.
- Shear, J. (1990a). Mystical experience, hermeneutics, and rationality. *International Philosophical Quarterly* 30, 391–401. doi:10.5840/ipq199030436.
- Shear, J. (1990b). *The inner dimension: Philosophy and the experience of consciousness*. 2nd ed. London, United Kingdom: Harmonia.
- Shear, J. (1994). On mystical experiences as support for the perennial philosophy. *Journal of the American Academy of Religion* 62, 319–342. doi:10.1093/jaarel/lxii.2.319.
- Shear, J. (1995). Mystical knowledge? *Sufi* 27, 12–16.
- Shear, J. (1996a). Back and forth with Huston Smith. *Sufi* 31, 8–9.
- Shear, J. (1996b). "On the existence of a culture independent core component of self," in *East-west encounters in philosophy and religion*, eds. N. Smart and B. S. Murthy (Long Beach, CA: Long Beach), 359–376.
- Shear, J. (1996c). The hard problem: Closing the empirical gap. *Journal of Consciousness Studies* 3, 54–68.
- Shear, J. (1995/1997a). "Introduction," in *Explaining consciousness – The "hard" problem*, ed. J. Shear (Cambridge, MA: MIT Press), 1–6.

- Shear, J. (1995/1997b). "The hard problem: Closing the empirical gap," in *Explaining consciousness – The "hard" problem*, ed. J. Shear (Cambridge, MA: MIT Press), 359–375.
- Shear, J. (1998). Experiential clarification of the problem of self. *Journal of Consciousness Studies* 5, 673–686.
- Shear, J. (1998/1999). "Experiential clarification of the problem of self," in *Models of the self*, eds. S. Gallagher and J. Shear (Devon, United Kingdom: Imprint), 407–420.
- Shear, J. (2002). "Ethics and the experience of happiness," in *Crossing boundaries: Essays on the ethical status of mysticism*, eds. G. W. Barnard and J. J. Kripal (New York, NY: Seven Bridges Press), 361–380.
- Shear, J. (2001/2002). "Experimental studies of meditation and consciousness," in *Religion and psychology: Mapping the terrain*, eds. D. Jonte-Pace and W. B. Parsons (London, United Kingdom: Routledge), 280–294.
- Shear, J. (2004). Mysticism and scientific naturalism. *Sophia* 43, 83–99.  
doi:10.1007/bf02782439.
- Shear, J. (2006a). "Conclusion," in *The experience of meditation: Experts introduce the major traditions*, ed. J. Shear (St. Paul, MN: Paragon House), 259–268.
- Shear, J. (2006b). "Introduction," in *The experience of meditation: Experts introduce the major traditions*, ed. J. Shear (St. Paul, MN: Paragon House), xiii–xxii.
- Shear, J. (2006c). "Transcendental Meditation," in *The experience of meditation: Experts introduce the major traditions*, ed. J. Shear (St. Paul, MN: Paragon House), 23–48.
- Shear, J. (2007). "Eastern methods of investigating mind and consciousness," in *The Blackwell companion to consciousness*, eds. M. Velmans and S. Schneider (Malden, MA: Blackwell), 697–710.
- Shear, J. (2011a). "Eastern approaches to altered states of consciousness," in *Altering consciousness: Multidisciplinary perspectives*, eds. E. Cardeña and M. Winkelmann (Santa Barbara, CA: Praeger), 139–158.
- Shear, J. (2011b). State-enlivening and practice-makes-perfect approaches to meditation. *Biofeedback* 39, 51–55. doi:10.5298/1081-5937-39.2.07.
- Shear, J. (2014a). "Meditation as first-person methodology: Real promise—and problems," in *Meditation – Neuroscientific approaches and philosophical implications*, eds. S. Schmidt and H. Walach (Cham, Switzerland: Springer International), 57–74.
- Shear, J. (2014b). Some reflections on meditation research and consciousness studies. *Journal of Consciousness Studies* 21, 202–215.
- Shear, J., and Jevning, R. (1999a). Pure consciousness: Scientific exploration of meditation techniques. *Journal of Consciousness Studies* 6, 189–210.

- Shear, J., and Jevning, R. (1999b). "Pure consciousness: Scientific exploration of meditation techniques," in *The view from within: First-person approaches to the study of consciousness*, eds. F. Varela and J. Shear (Devon, United Kingdom: Imprint Academic), 189–210.
- Travis, F. (2001). Autonomic and EEG patterns distinguish transcending from other experiences during Transcendental Meditation practice. *International Journal of Psychophysiology* 42, 1–9. doi:10.1016/s0167-8760(01)00143-x.
- Travis, F. (2006). "From I to I: Concepts of self on an object-referral/self-referral continuum," in *The concept of self in psychology*, ed. A. P. Prescott (New York, NY: Nova Science), 21–43.
- Travis, F. (2009). Brain functioning as the ground for spiritual experiences and ethical behavior. *FBI Law Enforcement Bulletin* 78, 26–32. doi:10.1037/e511562010-007.
- Travis, F. (2010). The Center for Brain, Consciousness, and Cognition at Maharishi University of Management. *Cognitive Processing* 11, 85–86. doi:10.1007/s10339-009-0349-9.
- Travis, F. (2011). "States of consciousness beyond waking, dreaming and sleeping: Perspectives from research on meditation experiences," in *States of consciousness: Experimental insights into meditation, waking, sleep and dreams*, eds. D. Cvetkovic and I. Cosic (Berlin, Germany: Springer), 223–234.
- Travis, F. (2014). Transcendental experiences during meditation practice. *Annals of the New York Academy of Sciences* 1307, 1–8. doi:10.1111/nyas.12316.
- Travis, F. (2016). Transcending as a driver of development. *Annals of the New York Academy of Sciences* 1373, 72–77. doi:10.1111/nyas.13071.
- Travis, F. (2018). "Long-term changes in experienced yoga practitioners: Growth of higher states of consciousness," in *Research based perspectives on the psychophysiology of yoga*, eds. S. Telles and N. Singh (Hershey, PA: IGI Global), 35–51.
- Travis, F., Munly, K., Olson, T. M., and Sorflaten, J. W. (2005). Maharishi Vedic science addresses the "hard" problem of consciousness. *Journal of Social Behavior and Personality* 17, 123–135.
- Travis, F., and Parim, N. (2017). Default mode network activation and Transcendental Meditation practice: Focused attention or automatic self-transcending? *Brain and Cognition* 111, 86–94. doi:10.1016/j.bandc.2016.08.009.
- Travis, F., and Pearson, C. (2000). Pure consciousness: Distinct phenomenological and physiological correlates of "consciousness itself". *International Journal of Neuroscience* 100, 77–89. doi:10.3109/00207450008999678.
- Travis, F., and Pearson, C. (2010). "Pure Consciousness: Distinct phenomenological and physiological correlates of 'consciousness itself'," in *Consciousness-based education: A foundation for teaching and learning in the academic disciplines*, eds. F. Travis, D. Llewellyn, and C. Pearson (Fairfield, IA: Maharishi University of Management), 343–359.

- Travis, F., and Shear, J. (2010a). Focused attention, open monitoring and automatic self-transcending: Categories to organize meditations from Vedic, Buddhist and Chinese traditions. *Consciousness and Cognition* 19, 1110–1118.  
doi:10.1016/j.concog.2010.01.007.
- Travis, F., and Shear, J. (2010b). Reply to Josipovic: Duality and non-duality in meditation research. *Consciousness and Cognition* 19, 1122–1123.  
doi:10.1016/j.concog.2010.04.003.
- Varela, F. J., and Shear, J. (1999a). “First-person accounts: Why, what and how,” in *The view from within: First-person approaches to the study of consciousness*, eds. F. Varela and J. Shear (Devon, United Kingdom: Imprint Academic), 1–14.
- Varela, F. J., and Shear, J. (1999b). First-person methodologies: What, why, how? *Journal of Consciousness Studies* 6, 1–14.
- Wallace, B. A. (1999a). The Buddhist tradition of Samatha: Methods for refining and examining consciousness. *Journal of Consciousness Studies* 6, 175–187.
- Wallace, B. A. (1999b). “Training the attention and exploring consciousness in Tibetan Buddhism,” in *Toward a science of consciousness III: The third Tucson discussions and debates*, eds. S. R. Hameroff, A. W. Kaszniak, and D. J. Chalmers (Cambridge, MA: MIT Press), 441–448.
- Wallace, B. A. (2000). *The taboo of subjectivity. Toward a new science of consciousness*. Oxford, United Kingdom: Oxford University Press.
- Wallace, B. A. (2001a). Intersubjectivity in Indo-Tibetan Buddhism. *Journal of Consciousness Studies* 8, 209–230.
- Wallace, B. A. (2001b). The potential of emptiness: Vacuum states in physics and consciousness. *The Scientific and Medical Network Review* 77, 21–25.
- Wallace, B. A. (2001/2003). *Buddhism with an attitude: The Tibetan seven-point mind-training*. Ithaca, NY: Snow Lion.
- Wallace, B. A. (1989/2003). *Choosing reality: A Buddhist view of physics and the mind*. Ithaca, NY: Snow Lion.
- Wallace, B. A. (2004). Scientific and Buddhist views of energy. *Subtle Energies & Energy Medicine* 15, 17–25.
- Wallace, B. A. (1998/2005). *Balancing the mind: A Tibetan Buddhist approach to refining attention*. Boston, MA: Shambhala.
- Wallace, B. A. (2005). *Genuine happiness: Meditation as the path to fulfillment*. Hoboken, NJ: John Wiley.
- Wallace, B. A. (2006a). *The attention revolution: Unlocking the power of the focused mind*. Somerville, MA: Wisdom.

- Wallace, B. A. (2006b). "Vacuum states of consciousness: A Tibetan Buddhist view," in *Buddhist thought and applied psychological research: Transcending the boundaries*, eds. D. K. Nauriyal, M. S. Drummond, and Y. B. Lal (Oxon, United Kingdom: Routledge), 112–121.
- Wallace, B. A. (2007a). *Contemplative science: Where Buddhism and neuroscience converge*. New York, NY: Columbia University Press.
- Wallace, B. A. (2007b). *Hidden dimensions: The unification of physics and consciousness*. New York, NY: Columbia University Press.
- Wallace, B. A. (2010). *The four immeasurables: Practices to open the heart*. 3rd ed. Ithaca, NY: Snow Lion.
- Wallace, B. A. (2011a). *Minding closely: The four applications of mindfulness*. Ithaca, NY: Snow Lion.
- Wallace, B. A. (2011b). *Stilling the mind: Shamatha teachings from Dūdjom Lingpa's Vajra Essence*. Somerville, MA: Wisdom.
- Wallace, B. A. (2012). *Dreaming yourself awake: Lucid dreaming and Tibetan dream yoga for insight and transformation*. Boston, MA: Shambhala.
- Wallace, B. A. (2012/2014). *Meditations of a Buddhist skeptic: A manifesto for the mind sciences and contemplative practice*. New York, NY: Columbia University Press.
- Wallace, B. A. (2009/2014). *Mind in the balance: Meditation in science, Buddhism, and Christianity*. New York, NY: Columbia University Press.
- Wallace, B. A. (2018). *Fathoming the mind: Inquiry and insight in Dūdjom Lingpa's Vajra Essence*. Somerville, MA: Wisdom.
- Wallace, B. A., and Hodel, B. (2008). *Embracing mind: The common ground of science & spirituality*. Boston, MA: Shambhala.
- Wallace, B. A., and Shapiro, S. L. (2006). Mental balance and well-being: Building bridges between Buddhism and Western psychology. *American Psychologist* 61, 690–701. doi:10.1037/0003-066x.61.7.690.
- Wallace, B. A., and Wilhelm, S. (1993). *Tibetan Buddhism from the ground up: A practical approach for modern life*. Boston, MA: Wisdom.
- Zanesco, A. P., King, B. G., MacLean, K. A., Jacobs, T. L., Aichele, S. R., Wallace, B. A., et al. (2016). Meditation training influences mind wandering and mindless reading. *Psychology of Consciousness* 3, 12. doi:10.1037/cns0000082.
