# Supplementary material for: Silence in Shamatha, Transcendental, and Stillness Meditation: An Evidence Synthesis Based on Expert Texts
Source: PubMed Central journal article supplement (PMC7360996; doi:10.3389/fpsyg.2020.01259), 2020-07-08
Supplement: Data_Sheet_8.pdf [file Data_Sheet_8.pdf]

## Database Contents List

### *List of Contents for Table S1 – Shamatha Extraction Table*

| Part/section no. | Part/section name                                                               | Page |
|------------------|---------------------------------------------------------------------------------|------|
| Part 1           | Technique and interim-states                                                    | 1    |
| 1.1              | Key root/source texts                                                           | 1    |
| 1.2              | Introduction to shamatha practice and the ten stages of attentional development | 1    |
| 1.3              | Tsongkhapa's practice                                                           | 2    |
| 1.4              | Mindfulness and introspection                                                   | 3    |
| 1.4.1            | Overarching guidance                                                            | 3    |
| 1.4.2            | Mindfulness                                                                     | 3    |
| 1.4.3            | Introspection                                                                   | 4    |
| 1.5              | Relaxation, stability, vividness, equanimity                                    | 5    |
| 1.5.1            | Overarching guidance                                                            | 5    |
| 1.5.2            | Relaxation                                                                      | 6    |
| 1.5.3            | Stability                                                                       | 7    |
| 1.5.4            | Vividness                                                                       | 7    |
| 1.5.5            | Equanimity                                                                      | 8    |
| 1.6              | Bare awareness/attention                                                        | 8    |
| 1.7              | Excitation and laxity                                                           | 9    |
| 1.7.1            | Overarching guidance                                                            | 9    |
| 1.7.2            | Excitation                                                                      | 9    |
| 1.7.3            | Laxity                                                                          | 10   |
| 1.7.4            | Remedies                                                                        | 10   |
| 1.8              | Will                                                                            | 11   |
| 1.9              | Mind-wandering                                                                  | 12   |
| 1.10             | Non-doing, effortlessness, relinquishment of control, loss of ego               | 12   |
| 1.11             | The ten stages                                                                  | 17   |
| 1.11.1           | Stage 1: Directed attention                                                     | 17   |
| 1.11.2           | Stage 2: Continuous attention                                                   | 17   |
| 1.11.3           | Stage 3: Resurgent attention                                                    | 17   |
| 1.11.4           | Stage 4: Close attention                                                        | 18   |
| 1.11.5           | Stage 5: Tamed attention                                                        | 18   |
| 1.11.6           | Stage 6: Pacified attention                                                     | 19   |
| 1.11.7           | Stage 7: Fully pacified attention                                               | 19   |
| 1.11.8           | Stage 8: Single-pointed attention                                               | 19   |
| 1.11.9           | Stage 9: Attentional balance                                                    | 20   |
| 1.11.10          | Stage 10: Shamatha                                                              | 20   |
| 1.12             | Practice 1 – Mindfulness of breathing                                           | 21   |
| 1.12.1           | Overarching guidance/comments                                                   | 21   |
| 1.12.2           | Basic instructions, awareness of breathing                                      | 21   |
| 1.12.3           | Allowing the breath to flow naturally                                           | 22   |
| 1.12.4           | Dealing with thoughts, distractions and discomfort                              | 22   |
| 1.12.5           | Breathing becoming calmer/subtler                                               | 23   |
| 1.12.6           | Counting breaths                                                                | 23   |
| 1.12.7           | Signs of progress                                                               | 23   |
| 1.13             | Practice 2 – Settling the mind in its natural state                             | 24   |
| 1.13.1           | Overarching guidance/comments                                                   | 24   |
| 1.13.2           | Basic instructions                                                              | 24   |
| 1.13.3           | Signs of progress                                                               | 28   |
| 1.13.4           | Stages of progress                                                              | 29   |
| 1.13.5           | Stillness and movement                                                          | 30   |
| 1.14             | Practice 3 – Awareness of awareness                                             | 30   |
| 1.14.1           | Overarching guidance/comments                                                   | 30   |
| 1.14.2           | Basic instructions                                                              | 31   |
| 1.14.3           | Pairing with breath                                                             | 32   |
| 1.14.4           | Awareness as an object                                                          | 32   |
| 1.14.5           | Signs of progress                                                               | 33   |
| 1.14.6           | Awareness of the preceding moment                                               | 34   |

## Database Contents List

|         |                                                                                        |    |
|---------|----------------------------------------------------------------------------------------|----|
| 1.15    | Possible pitfalls with more subtle shamatha techniques                                 | 34 |
| 1.16    | Other references to flawed meditation                                                  | 34 |
| 1.17    | Non-duality                                                                            | 35 |
| 1.18    | Non-conceptuality                                                                      | 35 |
| 1.19    | Glimpses of substrate consciousness                                                    | 36 |
| 1.20    | Other experiences                                                                      | 36 |
| 1.21    | Posture, dealing with discomfort                                                       | 37 |
| 1.22    | Duration of meditation sessions                                                        | 38 |
| 1.23    | Time/effort taken to progress, and factors supporting progress                         | 39 |
| 1.23.1  | General comments                                                                       | 39 |
| 1.23.2  | Comments on Tibetan Buddhist practitioners specifically                                | 43 |
| 1.24    | Participant-based academic studies of the subjective experience                        | 44 |
| Part 2  | Goal-state                                                                             | 44 |
| 2.1     | Terminology                                                                            | 44 |
| 2.1.1   | Terms used to describe features of the goal-state                                      | 44 |
| 2.1.2   | The term shamatha                                                                      | 45 |
| 2.1.3   | The term quiescence                                                                    | 45 |
| 2.1.4   | The term nature of the mind                                                            | 45 |
| 2.2     | Access to the first meditative stabilization                                           | 45 |
| 2.3     | Substrate consciousness                                                                | 46 |
| 2.3.1   | General comments                                                                       | 46 |
| 2.3.2   | Sleep, death, coma, fainting, hypnosis                                                 | 47 |
| 2.4     | Bhavanga                                                                               | 48 |
| 2.5     | Substrate                                                                              | 48 |
| 2.6     | Distinction between substrate consciousness and pristine awareness                     | 49 |
| 2.7     | Potential for rare individuals to achieve pristine awareness through shamatha practice | 50 |
| 2.8     | Potential for glimpses of pristine awareness                                           | 51 |
| 2.9     | Accessing pristine awareness by releasing grasping                                     | 52 |
| 2.10    | Dormant/implicit conceptualization in substrate consciousness                          | 52 |
| 2.11    | Use of substrate consciousness for particular purposes                                 | 53 |
| 2.12    | Potential to analyze                                                                   | 53 |
| 2.13    | Speed at which achieved                                                                | 54 |
| 2.14    | Features                                                                               | 54 |
| 2.14.1  | Recognize in retrospect                                                                | 54 |
| 2.14.2  | Conscious                                                                              | 54 |
| 2.14.3  | Consciousness/awareness itself                                                         | 55 |
| 2.14.4  | Awake, wakefulness                                                                     | 56 |
| 2.14.5  | Non-duality                                                                            | 56 |
| 2.14.6  | Bliss, joy, pleasantness, wellbeing, absence of discomfort                             | 57 |
| 2.14.7  | Luminosity, clearness, limpidity, transparency, radiance, purity                       | 58 |
| 2.14.8  | Cognizance, knowledge                                                                  | 61 |
| 2.14.9  | Stillness                                                                              | 63 |
| 2.14.10 | Silence, quietness                                                                     | 63 |
| 2.14.11 | Relaxation                                                                             | 63 |
| 2.14.12 | Mental rest                                                                            | 64 |
| 2.14.13 | Empty, contentless                                                                     | 64 |
| 2.14.14 | No thoughts                                                                            | 66 |
| 2.14.15 | No feelings                                                                            | 67 |
| 2.14.16 | No sense-perceptions or body-perceptions                                               | 68 |
| 2.14.17 | No mental images                                                                       | 69 |
| 2.14.18 | No memories                                                                            | 69 |
| 2.14.19 | Possible awareness of rhythm of breathing                                              | 70 |
| 2.14.20 | No grasping to the absent mental content                                               | 70 |
| 2.14.21 | Fullness/potential                                                                     | 70 |
| 2.14.22 | Calm, ease, peacefulness, absence of disturbance                                       | 70 |
| 2.14.23 | Possible loving-kindness                                                               | 71 |
| 2.14.24 | No longer mindful of meditation object                                                 | 71 |
| 2.14.25 | Attention on substrate/awareness/consciousness/quiescence/mind                         | 72 |
| 2.14.26 | Attentional stability                                                                  | 74 |
| 2.14.27 | Attentional vividness                                                                  | 75 |

Database Contents List

|         |                                                                      |    |
|---------|----------------------------------------------------------------------|----|
| 2.14.28 | Attentional balance                                                  | 76 |
| 2.14.29 | Effortlessness, relinquishment of control, non-doing                 | 77 |
| 2.14.30 | Natural state of the mind                                            | 77 |
| 2.14.31 | Ground state                                                         | 78 |
| 2.14.32 | Loss of ego                                                          | 78 |
| 2.14.33 | Simplicity                                                           | 79 |
| 2.14.34 | Wholeness, coherence, unity                                          | 79 |
| 2.14.35 | Inner security, safety                                               | 79 |
| 2.14.36 | Inner freedom                                                        | 80 |
| 2.14.37 | Timelessness                                                         | 80 |
| 2.14.38 | Spaciousness                                                         | 80 |
| 2.14.39 | Possible spiritual aspect                                            | 80 |
| 2.14.40 | Possible energy                                                      | 81 |
| 2.14.41 | Profound, deep                                                       | 81 |
| 2.14.42 | Non-changing                                                         | 82 |
| 2.14.43 | Subjective experience possibly varies between meditators             | 82 |
| 2.14.44 | Difficulty communicating the experience to those who have not had it | 82 |
|         | References                                                           | 83 |

*List of Contents for Table S2 – Transcendental Meditation Extraction Table*

| Part/section no. | Part/section name                                                                                              | Page |
|------------------|----------------------------------------------------------------------------------------------------------------|------|
| Part 1           | Technique and Interim-states                                                                                   | 1    |
| 1.1              | Simple                                                                                                         | 1    |
| 1.2              | Easy                                                                                                           | 1    |
| 1.3              | Pleasant                                                                                                       | 2    |
| 1.4              | Key features of the practice                                                                                   | 2    |
| 1.4.1            | General                                                                                                        | 2    |
| 1.4.2            | Dealing with distractions/discomforts                                                                          | 4    |
| 1.4.3            | Other obstacles                                                                                                | 4    |
| 1.5              | Other aspects of the practice/instruction                                                                      | 4    |
| 1.5.1            | Learning the practice – general                                                                                | 4    |
| 1.5.2            | The technique is quick to learn/perfect                                                                        | 4    |
| 1.5.3            | Selection of mantra                                                                                            | 5    |
| 1.5.4            | Mantras are private/secret                                                                                     | 5    |
| 1.5.5            | Oral rather than written instruction                                                                           | 5    |
| 1.5.6            | Retreats                                                                                                       | 5    |
| 1.6              | Effortlessness, control and relinquishment, no concentration                                                   | 5    |
| 1.6.1            | General                                                                                                        | 5    |
| 1.6.2            | The natural tendency                                                                                           | 8    |
| 1.7              | Posture                                                                                                        | 9    |
| 1.8              | Progression to the goal-state/s                                                                                | 9    |
| 1.8.1            | General                                                                                                        | 9    |
| 1.8.2            | Pure individuality and pure bliss/joy/happiness                                                                | 11   |
| 1.9              | Practice duration                                                                                              | 13   |
| Part 2           | Goal-state/s                                                                                                   | 13   |
| 2.1              | Terminology – “pure consciousness”, “transcending”, and related terms                                          | 13   |
| 2.2              | Shear’s logic-based argument that pure consciousness has a unique experiential quality                         | 13   |
| 2.3              | A fourth major state of consciousness, and other higher states                                                 | 14   |
| 2.4              | Statements that may be metaphysical and that do not clearly describe an additional feature of the goal-state/s | 14   |
| 2.5              | Participant-based academic studies of the subjective experience                                                | 15   |
| 2.5.1            | The Consciousness Integration Questionnaire                                                                    | 15   |
| 2.5.2            | Travis and Pearson (2000)                                                                                      | 15   |
| 2.5.3            | Other                                                                                                          | 16   |
| 2.6              | Speed at which achieved                                                                                        | 16   |
| 2.7              | Features                                                                                                       | 16   |
| 2.7.1            | Recognize in retrospect                                                                                        | 16   |
| 2.7.2            | Cannot say much about it                                                                                       | 17   |
| 2.7.3            | Conscious                                                                                                      | 18   |
| 2.7.4            | Pure consciousness/awareness                                                                                   | 18   |

Database Contents List

|        |                                                                              |    |
|--------|------------------------------------------------------------------------------|----|
| 2.7.5  | Awake, wakefulness                                                           | 19 |
| 2.7.6  | Non-duality                                                                  | 21 |
| 2.7.7  | Stillness                                                                    | 22 |
| 2.7.8  | Silence, quietness                                                           | 22 |
| 2.7.9  | Dynamic                                                                      | 23 |
| 2.7.10 | Clearness                                                                    | 23 |
| 2.7.11 | Purity                                                                       | 23 |
| 2.7.12 | Relaxation                                                                   | 24 |
| 2.7.13 | Mental rest                                                                  | 24 |
| 2.7.14 | Contentless, reduced mental activity                                         | 24 |
| 2.7.15 | Limited or no abstract content                                               | 27 |
| 2.7.16 | No thoughts                                                                  | 28 |
| 2.7.17 | No feelings                                                                  | 29 |
| 2.7.18 | No sense-perceptions                                                         | 30 |
| 2.7.19 | No body-perceptions                                                          | 31 |
| 2.7.20 | No mental images                                                             | 32 |
| 2.7.21 | No memories                                                                  | 32 |
| 2.7.22 | Cycling                                                                      | 32 |
| 2.7.23 | Increasing length                                                            | 33 |
| 2.7.24 | Calm, ease, peacefulness, absence of disturbance                             | 33 |
| 2.7.25 | Beyond peacefulness                                                          | 34 |
| 2.7.26 | Bliss, joy, happiness                                                        | 34 |
| 2.7.27 | No sense of anxiety                                                          | 36 |
| 2.7.28 | No longer aware of mantra                                                    | 36 |
| 2.7.29 | Effortlessness, relinquishment of control, non-doing, no focus/concentration | 37 |
| 2.7.30 | Attention directed inward                                                    | 37 |
| 2.7.31 | Transcendence of discomfort                                                  | 38 |
| 2.7.32 | Naturalness                                                                  | 38 |
| 2.7.33 | Loss of ego                                                                  | 39 |
| 2.7.34 | Simplicity                                                                   | 39 |
| 2.7.35 | Pure being/Being                                                             | 40 |
| 2.7.36 | Nature of mind/being, ground state, self/Self                                | 40 |
| 2.7.37 | Wholeness, integration, unity                                                | 42 |
| 2.7.38 | Inner security, safety, strength, contentment                                | 43 |
| 2.7.39 | Inner freedom, unboundedness                                                 | 43 |
| 2.7.40 | Spacelessness                                                                | 44 |
| 2.7.41 | Timelessness                                                                 | 45 |
| 2.7.42 | Knowledge                                                                    | 46 |
| 2.7.43 | Possible spiritual aspect                                                    | 46 |
| 2.7.44 | Possible energy                                                              | 47 |
| 2.7.45 | Profound                                                                     | 47 |
| 2.7.46 | Deep                                                                         | 48 |
| 2.7.47 | Non-changing                                                                 | 48 |
| 2.7.48 | Subjective experience varies between meditators and across/within sessions   | 49 |
| 2.7.49 | Description in words is limited                                              | 51 |
|        | References                                                                   | 51 |

*List of Contents for Table S3 – Stillness Meditation Extraction Table*

| Part/section no. | Part/section name                   | Page |
|------------------|-------------------------------------|------|
| Part 1           | Technique and Interim-states        | 1    |
| 1.1              | References to Stillness Meditation  | 1    |
| 1.2              | Simple                              | 1    |
| 1.3              | Easy                                | 1    |
| 1.4              | Pleasant                            | 2    |
| 1.5              | Regression                          | 3    |
| 1.6              | Major presentations of the practice | 3    |
| 1.6.1            | Meares (1967/1968)                  | 3    |
| 1.6.2            | Meares (1978/1986)                  | 4    |
| 1.6.3            | Meares (1969c)                      | 5    |
| 1.6.4            | Meares (1973b)                      | 5    |

## Database Contents List

|        |                                                                       |    |
|--------|-----------------------------------------------------------------------|----|
| 1.6.5  | Meares (1989)                                                         | 6  |
| 1.6.6  | Meares (1987/1991)                                                    | 6  |
| 1.6.7  | Meares (1970)                                                         | 6  |
| 1.6.8  | Meares (1976b)                                                        | 6  |
| 1.6.9  | Elaborations in other Meares sources                                  | 7  |
| 1.6.10 | McKinnon (1983/2016)                                                  | 7  |
| 1.6.11 | McKinnon (2011)                                                       | 8  |
| 1.6.12 | McKinnon (1991)                                                       | 9  |
| 1.6.13 | McKinnon (2002/2008)                                                  | 10 |
| 1.7    | Classes                                                               | 10 |
| 1.8    | Effortlessness                                                        | 13 |
| 1.9    | Mind-wandering                                                        | 16 |
| 1.10   | Slight/minor discomfort                                               | 17 |
| 1.11   | Posture                                                               | 18 |
| 1.11.1 | Meares' overarching principle, and McKinnon's contrasting perspective | 18 |
| 1.11.2 | Definite/symmetrical posture                                          | 19 |
| 1.11.3 | Lying                                                                 | 19 |
| 1.11.4 | Sitting – general                                                     | 19 |
| 1.11.5 | Cross-legged sitting                                                  | 20 |
| 1.11.6 | Kneeling                                                              | 20 |
| 1.12   | Control and relinquishment, discipline and ease                       | 20 |
| 1.13   | No focus/concentration                                                | 21 |
| 1.14   | Progression to goal-state/s                                           | 21 |
| 1.15   | Difficulties and how to deal with them                                | 22 |
| 1.15.1 | Trying too hard                                                       | 22 |
| 1.15.2 | Dealing with thoughts                                                 | 23 |
| 1.15.3 | Letting go                                                            | 23 |
| 1.15.4 | Sleep                                                                 | 24 |
| 1.16   | Unusual subjective phenomena                                          | 25 |
| 1.17   | Practice duration                                                     | 26 |
| 1.18   | Can learn via non-class practice                                      | 26 |
| Part 2 | Goal-state/s                                                          | 27 |
| 2.1    | Participant-based academic studies of the subjective experience       | 27 |
| 2.2    | Speed at which achieved                                               | 27 |
| 2.3    | Features                                                              | 28 |
| 2.3.1  | Recognize in retrospect                                               | 28 |
| 2.3.2  | Conscious                                                             | 29 |
| 2.3.3  | Awake, wakefulness, clearness, purity                                 | 29 |
| 2.3.4  | Non-duality                                                           | 30 |
| 2.3.5  | Stillness                                                             | 31 |
| 2.3.6  | Silence, quietness                                                    | 32 |
| 2.3.7  | Depth/height/fullness                                                 | 33 |
| 2.3.8  | Relaxation                                                            | 33 |
| 2.3.9  | Mental rest                                                           | 34 |
| 2.3.10 | Emptiness, nothingness, reduced mental activity                       | 34 |
| 2.3.11 | No thoughts                                                           | 35 |
| 2.3.12 | No feelings                                                           | 36 |
| 2.3.13 | Reduced awareness/perception, loss of logical/critical faculties      | 37 |
| 2.3.14 | No mental images                                                      | 39 |
| 2.3.15 | No memories                                                           | 40 |
| 2.3.16 | Ebb and flow                                                          | 40 |
| 2.3.17 | Increasing length                                                     | 40 |
| 2.3.18 | Calm, ease, peacefulness, absence of disturbance                      | 41 |
| 2.3.19 | Good/wonderful                                                        | 43 |
| 2.3.20 | Beyond calmness/stillness/goodness                                    | 45 |
| 2.3.21 | No sense of anxiety                                                   | 46 |
| 2.3.22 | No focus/concentration                                                | 46 |
| 2.3.23 | Transcendence of discomfort                                           | 47 |
| 2.3.24 | Naturalness                                                           | 47 |
| 2.3.25 | Effortlessness                                                        | 48 |

## Database Contents List

|        |                                                                            |    |
|--------|----------------------------------------------------------------------------|----|
| 2.3.26 | Control and relinquishment                                                 | 49 |
| 2.3.27 | Loss of ego                                                                | 49 |
| 2.3.28 | Simplicity, simple/pure being, non-doing                                   | 49 |
| 2.3.29 | Nature of mind/being, self                                                 | 51 |
| 2.3.30 | Wholeness, integration, unity                                              | 52 |
| 2.3.31 | Inner security, safety, strength, contentment                              | 53 |
| 2.3.32 | Inner freedom, unboundedness, spaciousness                                 | 54 |
| 2.3.33 | Timelessness                                                               | 55 |
| 2.3.34 | Knowledge, understanding                                                   | 55 |
| 2.3.35 | Possible spiritual aspect                                                  | 57 |
| 2.3.36 | Profound                                                                   | 58 |
| 2.3.37 | Deep                                                                       | 59 |
| 2.3.38 | Subjective experience varies between meditators and across/within sessions | 60 |
| 2.3.39 | Description in words is limited                                            | 60 |
|        | References                                                                 | 61 |

---
